# Supplementary material for: Isothiazolones; thiol-reactive inhibitors of cysteine protease cathepsin B and histone acetyltransferase PCAF
Source: Royal Society of Chemistry journal article supplement (doi:10.1039/c0ob00464b), 2011-01-01
Supplement: c0ob00464b.pdf [file c0ob00464b.pdf]

# Electronic supporting information

## for

### Isothiazolones; thiol-reactive inhibitors of cysteine protease cathepsin B and histone acetyl transferase PCAF

Rosalina Wisastra, Massimo Ghizzoni, Adriaan J. Minnaard, Harm Maarsingh, Hidde J.  
Haisma, Frank J. Dekker

#### Experimental section

#### Chemistry

**Table S1.** Interatomic distances (Å) in the crystal structures for compounds **1** and **5**.

|    |    | 2-phenyl-<br>isothiazolo-<br>lone <b>1</b> | 5-chloro-2-<br>phenyl-isothiazolo-<br>lone <b>5</b> | Literature values sp <sup>2</sup> <sup>a</sup> | Literature values sp <sup>3</sup> <sup>a</sup> |
|----|----|--------------------------------------------|-----------------------------------------------------|------------------------------------------------|------------------------------------------------|
| Cl | C1 |                                            | 1.7084(18)                                          |                                                | 1.76                                           |
| S  | N  | 1.715(4)                                   | 1.7038(15)                                          | 1.56                                           | 1.78                                           |
| S  | C1 | 1.702(6)                                   | 1.7269(18)                                          | 1.70 (thiophene) <sup>b</sup><br>1.61          | 1.81                                           |
| O  | C3 | 1.243(6)                                   | 1.231(2)                                            | 1.23-1.24 (amides)                             | 1.42-1.44 (ethers)                             |
| N  | C3 | 1.401(7)                                   | 1.396(2)                                            | 1.35 (imines)                                  | 1.46-1.48 (amines)                             |
| N  | C4 | 1.433(7)                                   | 1.433(2)                                            | 1.35 (imines)                                  | 1.46-1.48 (amines)                             |
| C1 | C2 | 1.345(7)                                   | 1.346(3)                                            | 1.31-1.34 (alkene)                             |                                                |
| C2 | C3 | 1.452(7)                                   | 1.454(3)                                            | 1.45-1.46<br>(single conjugated)               |                                                |
| C4 | C5 | 1.399(7)                                   | 1.396(3)                                            | 1.38-1.40 (aromatic)                           |                                                |
| C4 | C9 | 1.408(7)                                   | 1.393(3)                                            | 1.38-1.40 (aromatic)                           |                                                |
| C5 | C6 | 1.383(7)                                   | 1.384(3)                                            | 1.38-1.40 (aromatic)                           |                                                |
| C6 | C7 | 1.391(8)                                   | 1.395(3)                                            | 1.38-1.40 (aromatic)                           |                                                |
| C7 | C8 | 1.402(8)                                   | 1.392(3)                                            | 1.38-1.40 (aromatic)                           |                                                |
| C8 | C9 | 1.374(9)                                   | 1.389(3)                                            | 1.38-1.40 (aromatic)                           |                                                |

Standard uncertainty in the last decimal place is given in parentheses

a <sup>1</sup>, b CCDC 617103

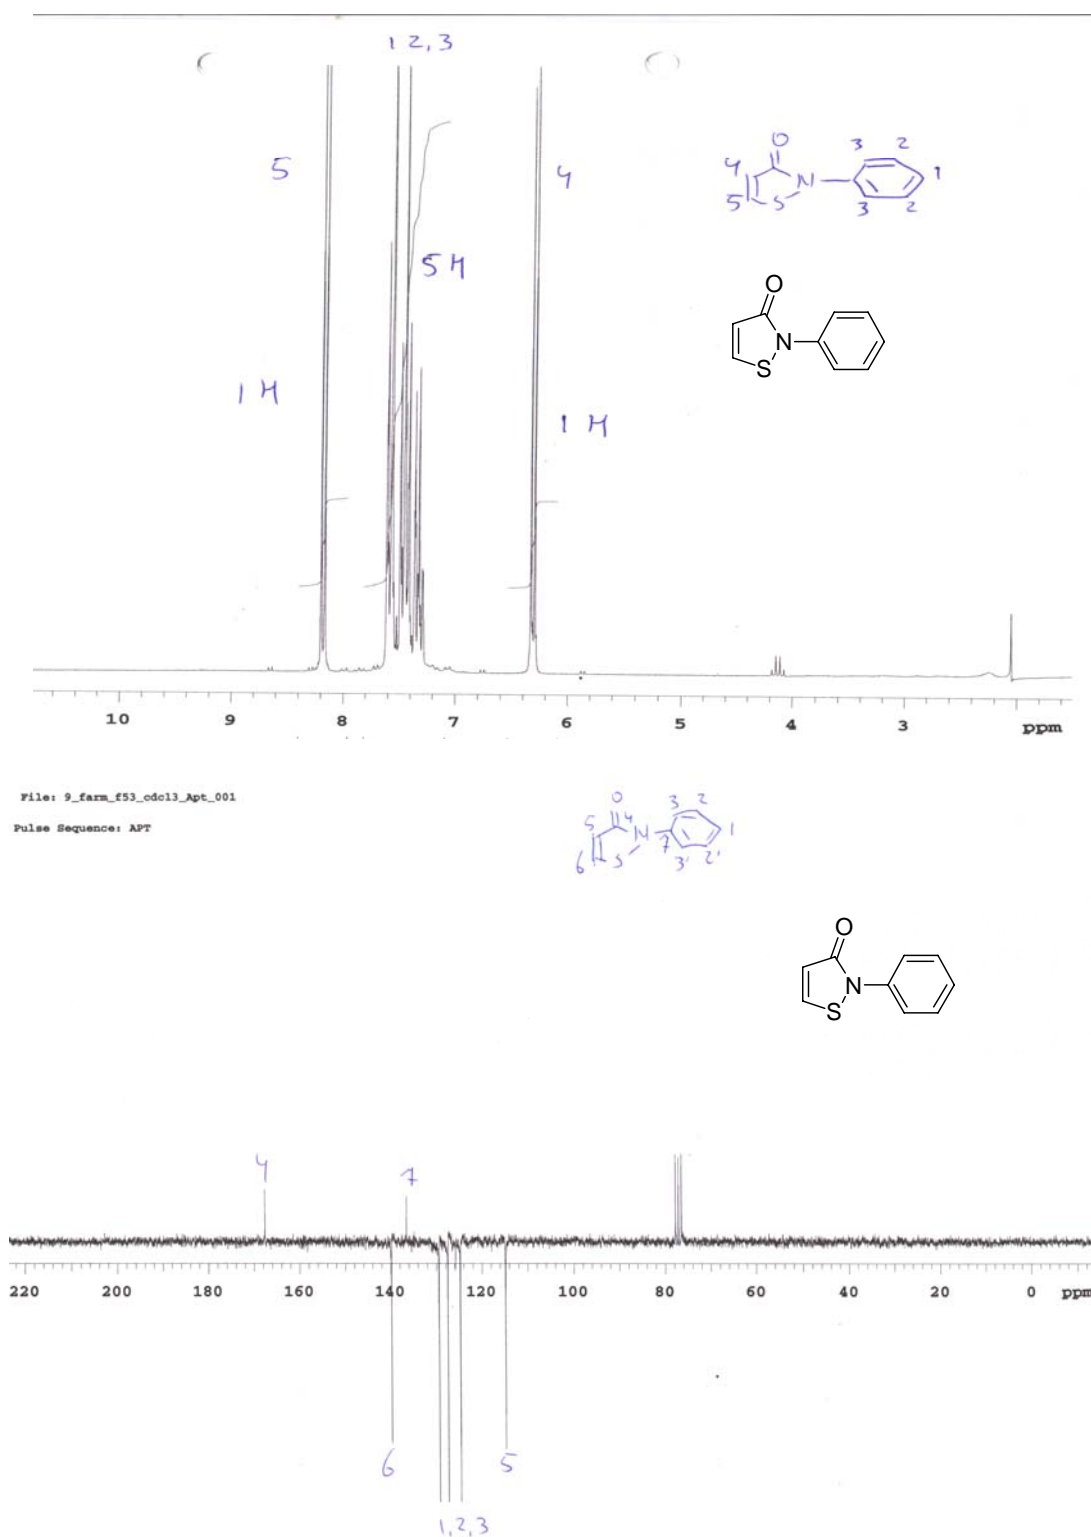

**Figure S1.**  $^1\text{H}$  and  $^{13}\text{C}$  NMR spectra of **1**.

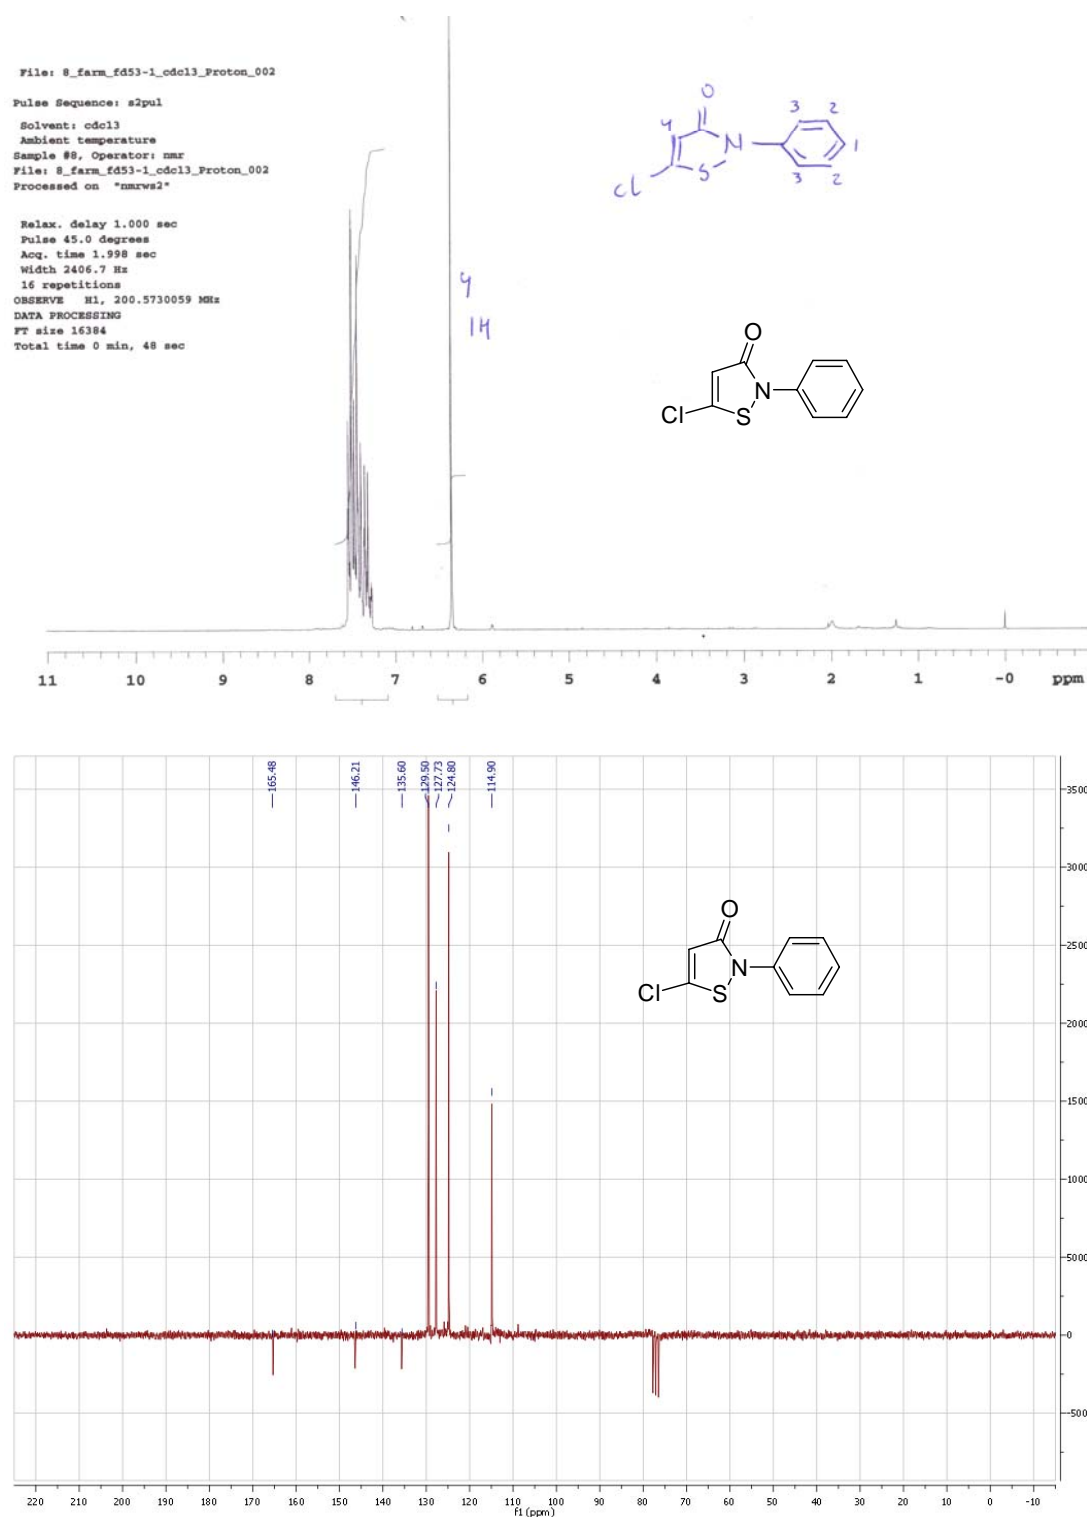

Figure S2.  $^1\text{H}$  and  $^{13}\text{C}$  NMR spectra of **5**.

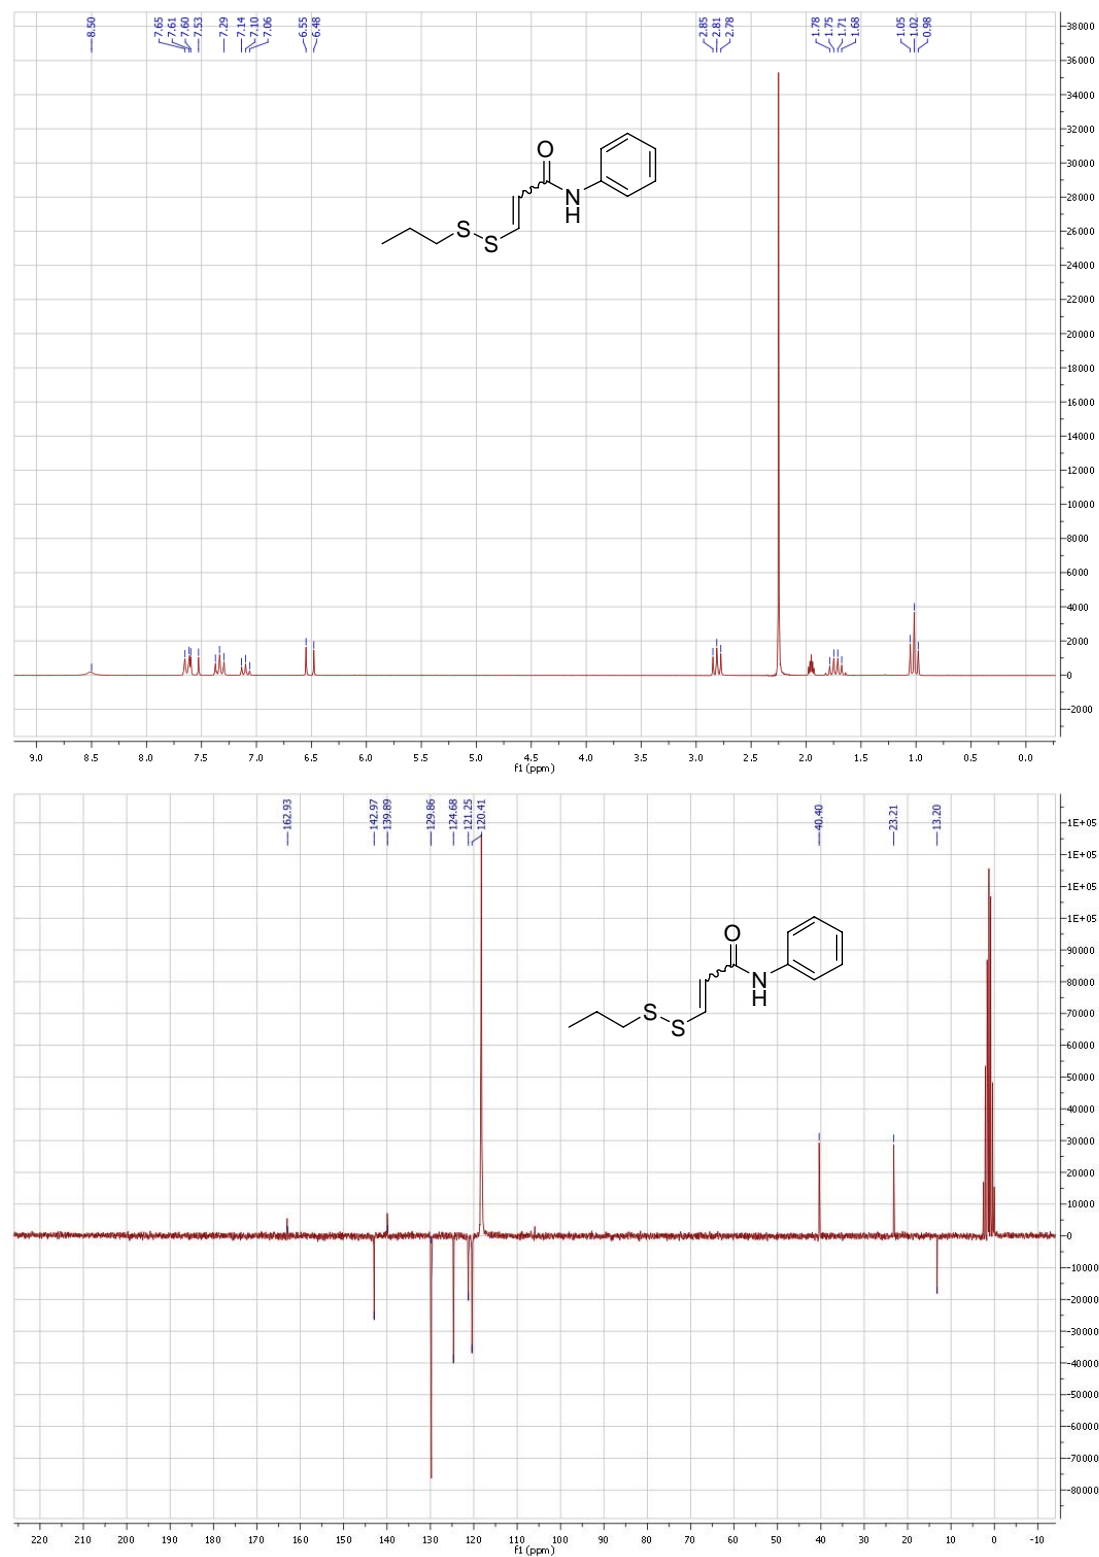

**Figure S3.** <sup>1</sup>H and <sup>13</sup>C NMR spectra of **3**.

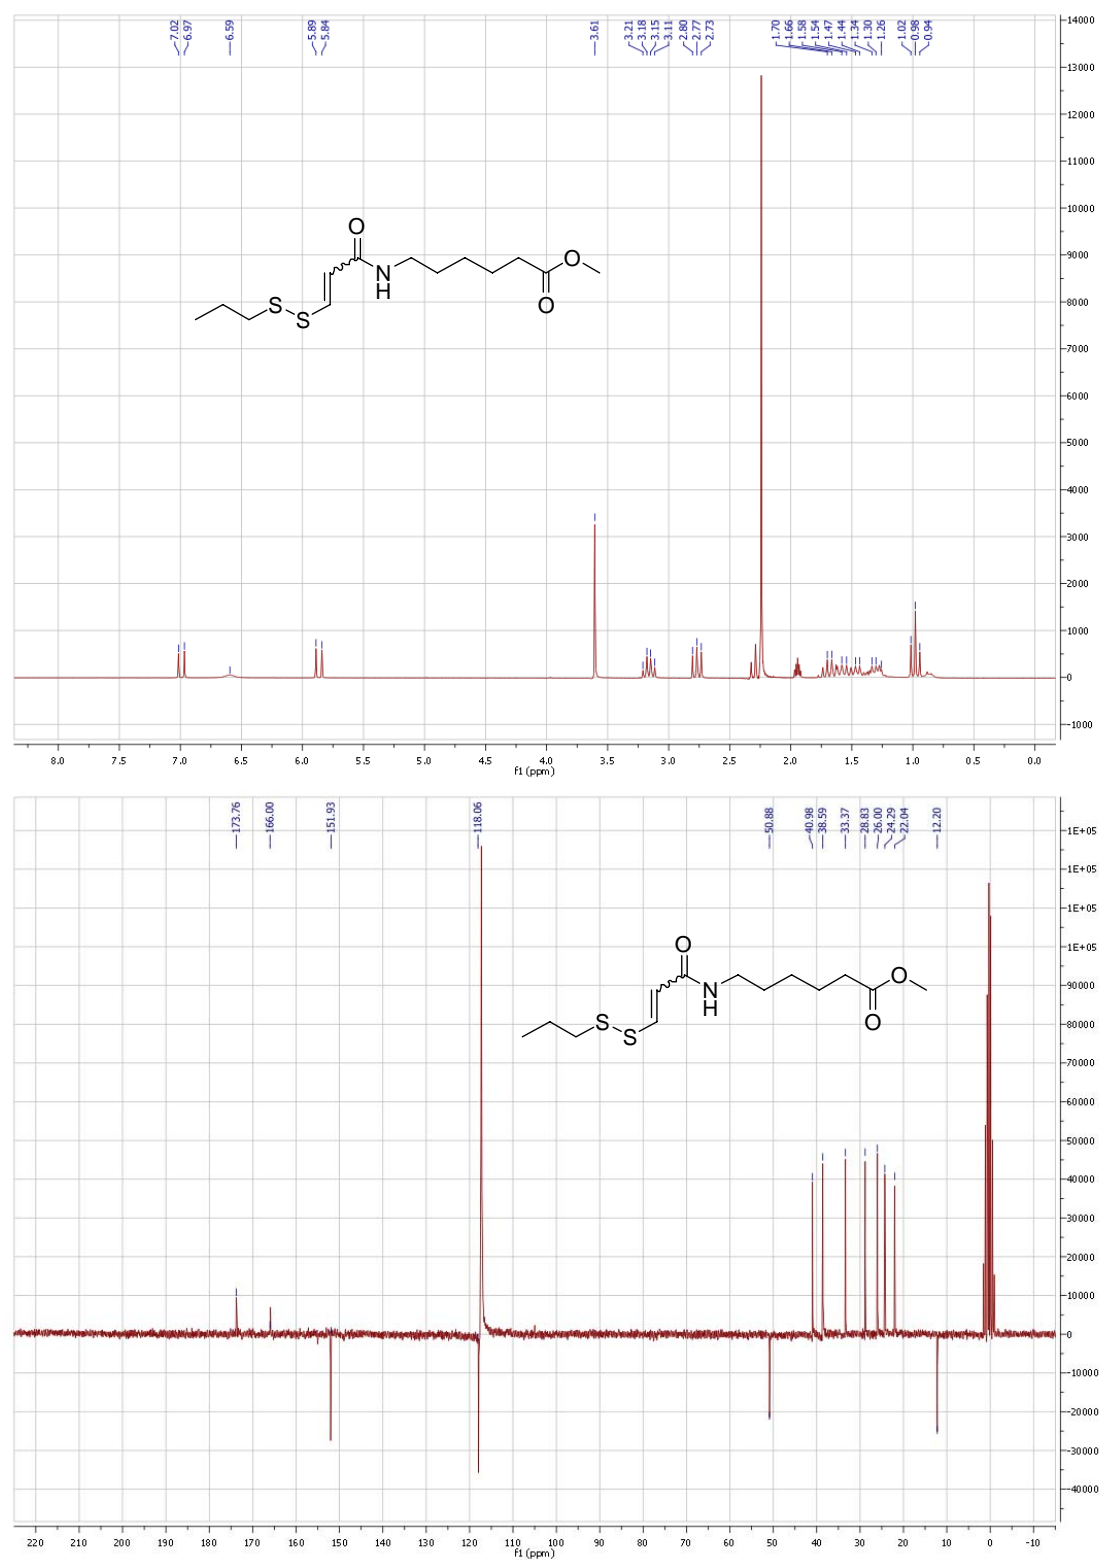

**Figure S4.**  $^1\text{H}$  and  $^{13}\text{C}$  NMR spectra of **4** .

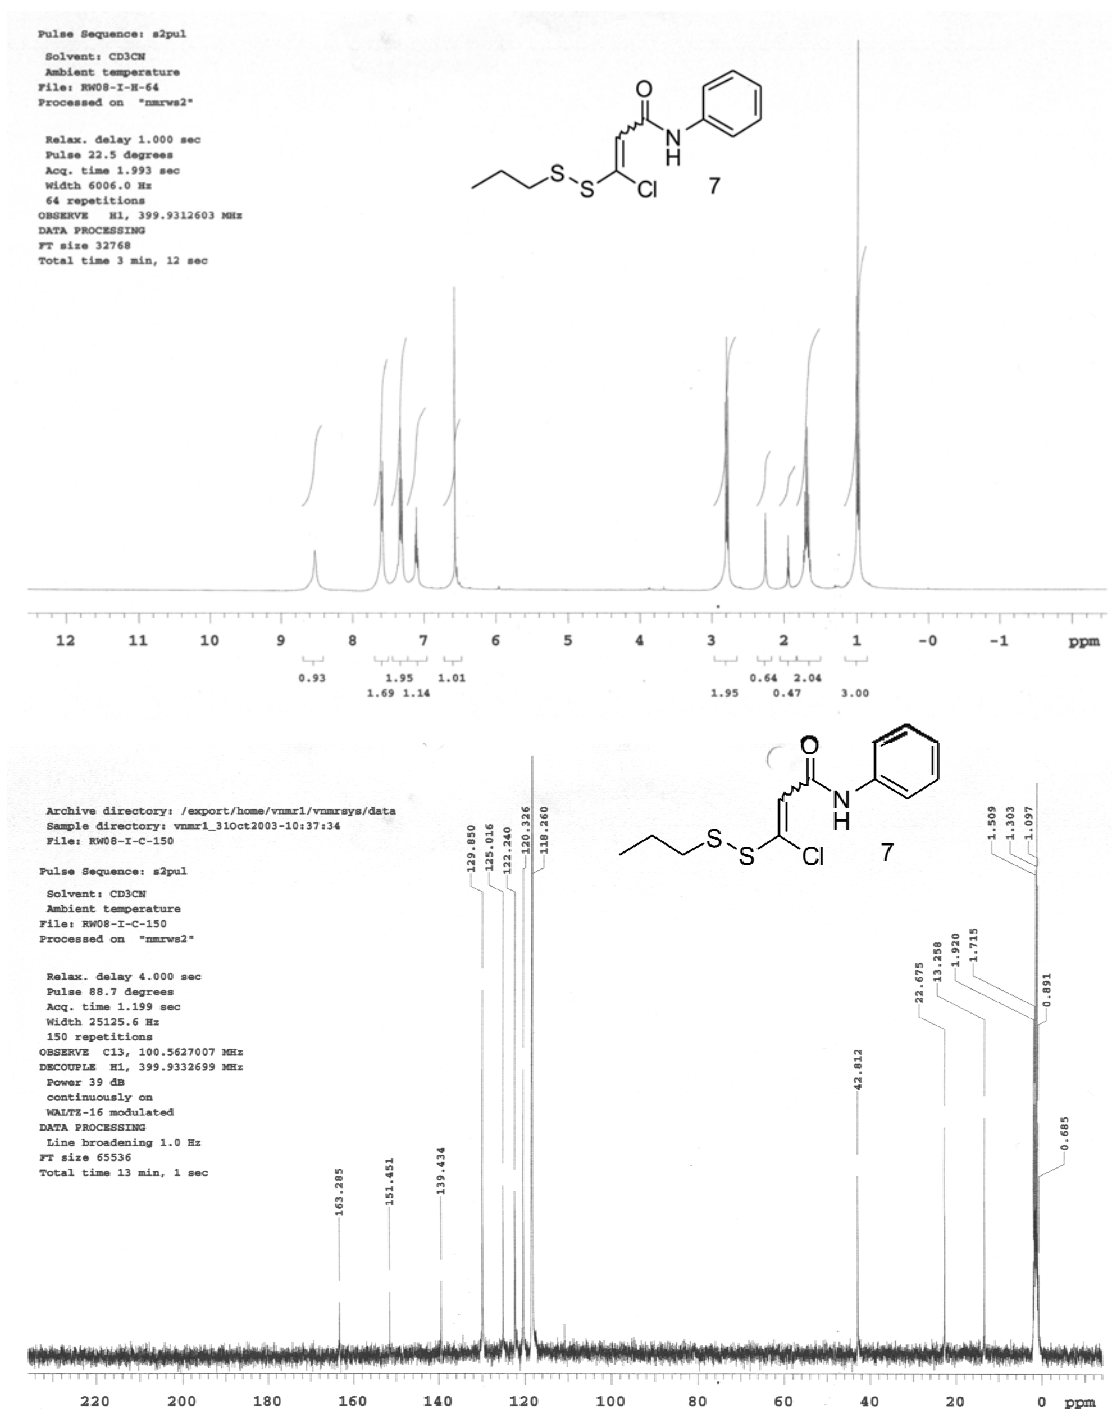

Figure S5.  $^1\text{H}$  and  $^{13}\text{C}$  NMR spectra of 7.

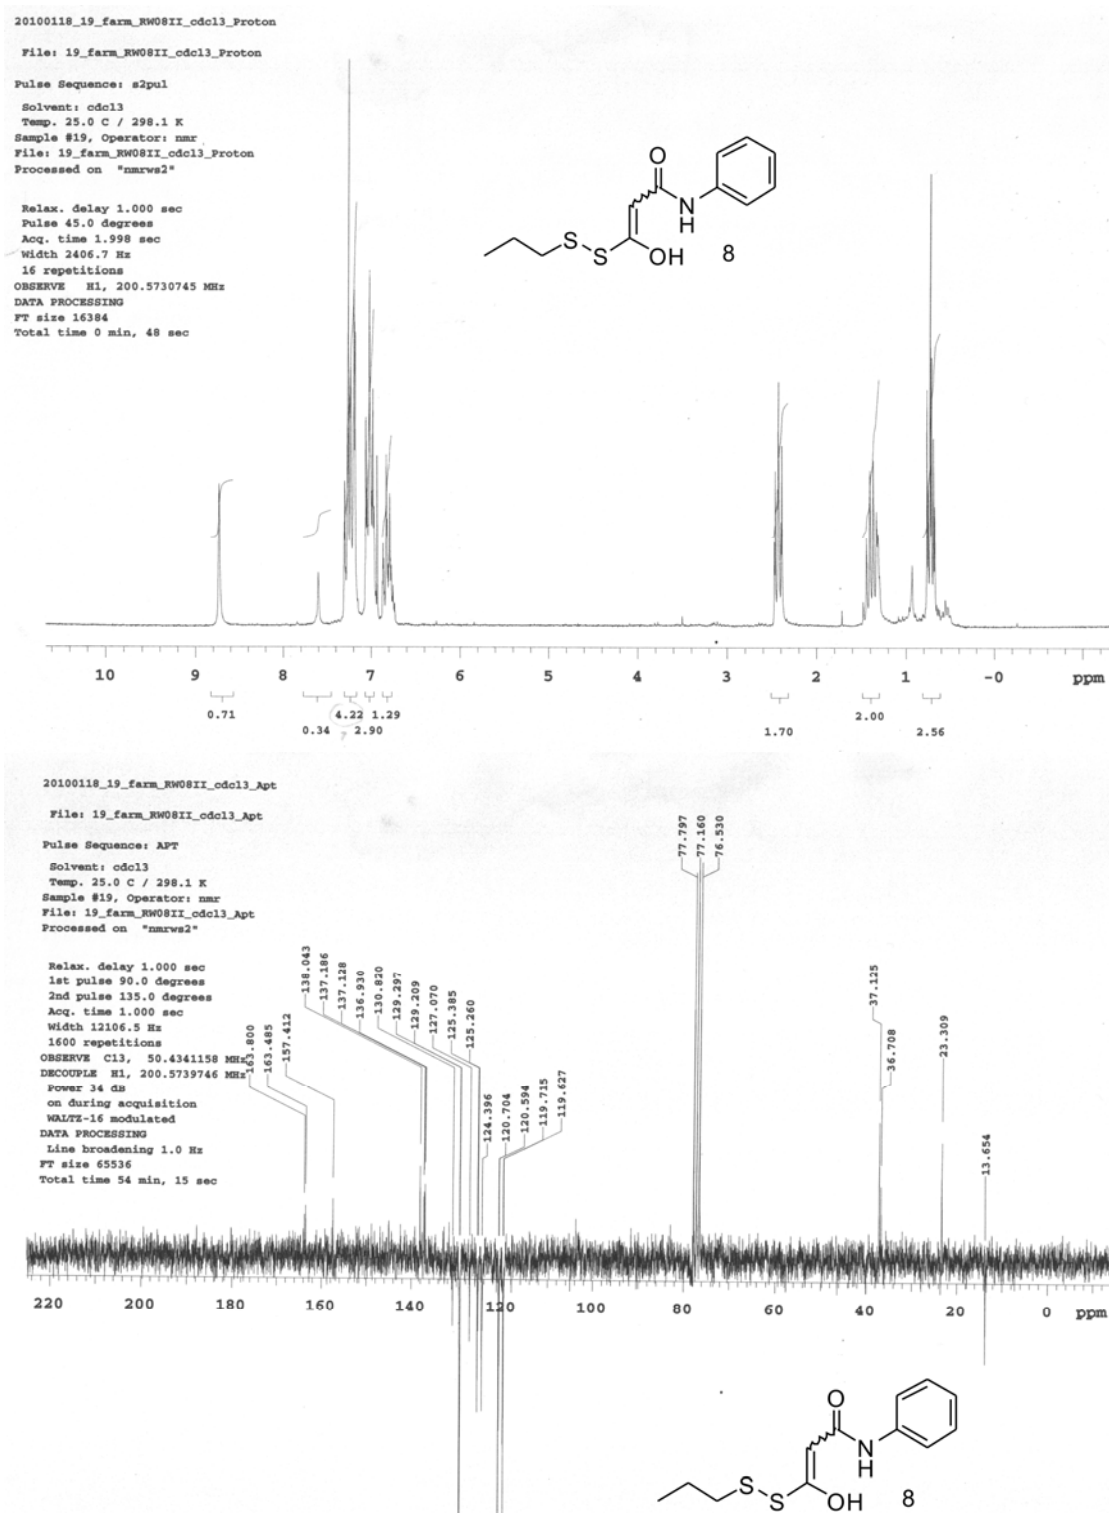

Figure S6. <sup>1</sup>H and <sup>13</sup>C NMR spectra of 8.

## Biochemistry

**Table S2.** IC<sub>50</sub> values for inhibition of Cathepsin B and PCAF

| 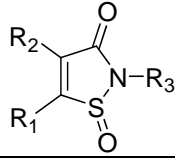 | R <sub>1</sub>                                     | R <sub>2</sub> | R <sub>3</sub>                                      | Cat B <sup>a</sup><br>IC <sub>50</sub> (μM) | PCAF <sup>b</sup><br>IC <sub>50</sub> (μM) |
|-----------------------------------------------------------------------------------|----------------------------------------------------|----------------|-----------------------------------------------------|---------------------------------------------|--------------------------------------------|
| <b>19</b>                                                                         | Cl                                                 | H              | -Ethyl                                              | 27.4 ± 1.1                                  | >10                                        |
| <b>20</b>                                                                         | Cl                                                 | Cl             | -Ethyl                                              | 39.0 ± 0.5                                  | >10                                        |
| <b>21</b>                                                                         | Cl                                                 | Methyl         | -Ethyl                                              | 17.4 ± 1.3                                  | >10                                        |
| <b>22</b>                                                                         | Cl                                                 | H              | -(CH <sub>2</sub> ) <sub>2</sub> CO <sub>2</sub> Me | 21.3 ± 1.5                                  | 5.6 ± 0.2                                  |
| <b>23</b>                                                                         | Cl                                                 | Cl             | -(CH <sub>2</sub> ) <sub>2</sub> CO <sub>2</sub> Me | 34.5 ± 1.2                                  | >10                                        |
| <b>24</b>                                                                         | Cl                                                 | Methyl         | -(CH <sub>2</sub> ) <sub>2</sub> CO <sub>2</sub> Me | 23.1 ± 3.1                                  | >10                                        |
| <b>25</b>                                                                         | -S(CH <sub>2</sub> ) <sub>11</sub> CH <sub>3</sub> | H              | -(CH <sub>2</sub> ) <sub>2</sub> CO <sub>2</sub> Me | >100                                        | >10                                        |
| <b>26</b>                                                                         | -S(CH <sub>2</sub> ) <sub>11</sub> CH <sub>3</sub> | Cl             | -(CH <sub>2</sub> ) <sub>2</sub> CO <sub>2</sub> Me | >100                                        | >10                                        |

<sup>a</sup> maximal concentration in the assay 100 μM.

<sup>b</sup> data reported previously.<sup>2,3</sup> maximal concentration in the assays 10 μM

**Table S3.** Enzyme kinetics parameters for Cathepsin B inhibition (n = 3)

|                                                                                               | Conc<br>inhibitor<br>(μM) | V <sub>max</sub><br>(nmol/s) | K <sub>m</sub> (mM) | K <sub>S</sub> (mM) | R <sup>2</sup> |
|-----------------------------------------------------------------------------------------------|---------------------------|------------------------------|---------------------|---------------------|----------------|
| 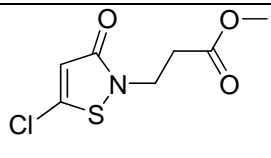 <b>14</b> | 0                         | 0.65 ± 0.66                  | 1.2 ± 1.3           | 0.10 ± 0.11         | 0.989          |
|                                                                                               | 6                         | 0.51 ± 0.24                  | 1.4 ± 0.7           | 0.10 ± 0.051        | 0.998          |
|                                                                                               | 12                        | 0.23 ± 0.13                  | 1.2 ± 0.7           | 0.20 ± 0.13         | 0.995          |
|  <b>22</b> | 0                         | 0.56 ± 0.67                  | 1.1 ± 1.4           | 0.098 ± 0.13        | 0.982          |
|                                                                                               | 11                        | 0.52 ± 0.59                  | 1.1 ± 1.2           | 0.11 ± 0.15         | 0.972          |
|                                                                                               | 22                        | 0.50 ± 0.70                  | 1.1 ± 1.9           | 0.090 ± 0.15        | 0.972          |



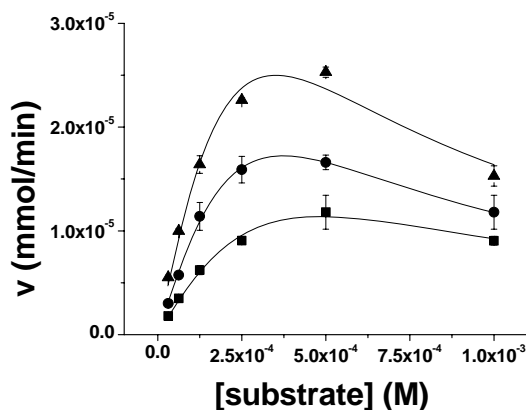

**Figure S7.** Conversion of the substrate Cbz-Arg-Arg-AMC by the enzyme Cathepsin B with no inhibitor present ( $\blacktriangle$ ) shows substrate inhibition at high substrate concentrations. The same is observed for the enzyme activity after preincubation with 6  $\mu$ M inhibitor **14** ( $\bullet$ ) and the enzyme activity after preincubation with 12  $\mu$ M inhibitor **14** ( $\blacksquare$ ). The data were fitted to equation 1 and the parameters are shown in table S3.

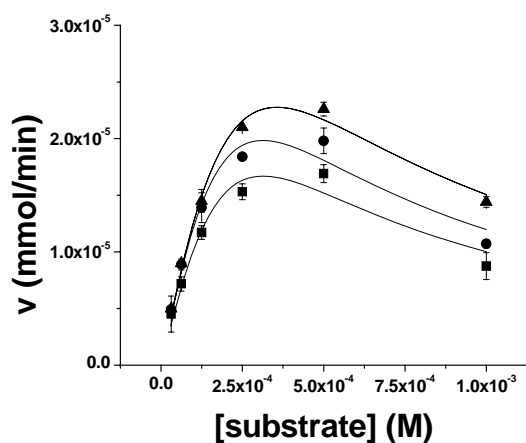

**Figure S8.** Conversion of the substrate Cbz-Arg-Arg-AMC by the enzyme Cathepsin B with no inhibitor present ( $\blacktriangle$ ) shows substrate inhibition at high substrate concentrations. The same is observed for the enzyme activity after preincubation with 11  $\mu$ M inhibitor **22** ( $\bullet$ ) and the enzyme activity after preincubation with 22  $\mu$ M inhibitor **22** ( $\blacksquare$ ). The data were fitted to equation 1 and the parameters are shown in table S3. The data represented by the blocks ( $\blacksquare$ ) and circles ( $\bullet$ ) did not fit well to equation 1.

**Table S4.** Time dependent inhibition of Cathepsin B by **5**. The IC<sub>50</sub> of the residual enzyme activity was determined after 1, 15, 40 or 120 minutes pre-incubation of the enzyme with the inhibitor (n = 3).

| Time (min) | IC <sub>50</sub> (μM) |
|------------|-----------------------|
| 1          | 13.6 ± 1.5            |
| 15         | 12.7 ± 1.3            |
| 40         | 9.3 ± 1.1             |
| 120        | 8.1 ± 1.0             |

**Table S5.** Dilution experiments after pre-incubation of Cathepsin B (20 nM) and inhibitor **5** (17 μM) with a substrate solution (100 μM) demonstrates a reduction of activity that is proportional to the dilution. This demonstrates covalent binding of the enzyme to the inhibitor (n = 3) <sup>6</sup>.

| Dilution | v (fluorescence units/min) | Reduction in activity |
|----------|----------------------------|-----------------------|
| 1        | 13.3 ± 0.5                 | 1.00                  |
| 2        | 6.9 ± 0.1                  | 1.93                  |
| 5        | 2.7 ± 0.1                  | 4.93                  |

**Table S6.** Reduction rate of cathepsin B by **5**. The initial rate of cathepsin B (1.5 nM) activity with or without inhibitor **5** (14 μM) were determine after 20 second reaction of the enzyme with the substrate (33.3 μM). (n = 3) The result shows a very quick reduction of the enzyme activity in presence of the inhibitor.

| Inhibitor        | V (fluorescence units/s) |
|------------------|--------------------------|
| No Inhibitor     | 25.3 ± 1.2               |
| <b>5</b> (14 μM) | 11.9 ± 5.0               |

### Applied Biosystems Voyager System 6363

Voyager Spec #1=>NF0.7=>SM19=>NR(2.00)[BP = 27959.7, 789]

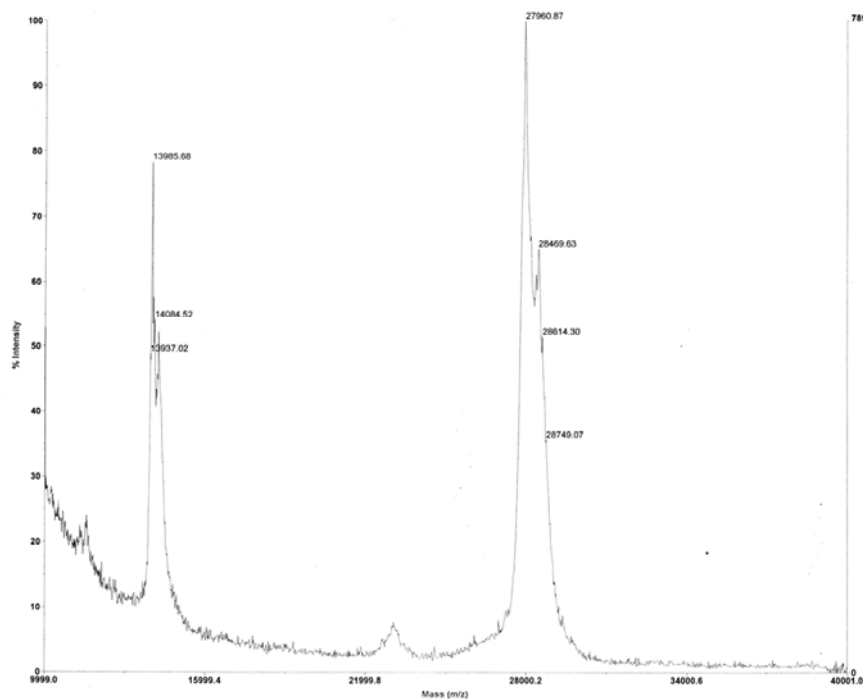

Mode of operation: Linear  
Extraction mode: Delayed  
Polarity: Positive  
Acquisition control: Manual

Accelerating voltage: 25000 V  
Grid voltage: 92.2%  
Guide wire 0: 0.15%  
Extraction delay time: 350 nsec

Acquisition mass range: 10000 – 40000 Da  
Number of laser shots: 100/spectrum  
Laser intensity: 1712  
Laser Rep Rate: 20.0 Hz  
Calibration type: Default  
Calibration matrix: Sinapinic acid  
Low mass gate: 5000 Da

Digitizer start time: 60.832  
Bin size: 2 nsec  
Number of data points: 30291  
Vertical scale: 50 mV  
Vertical offset: 0%  
Input bandwidth: 25 MHz

Sample well: 36  
Plate ID: 1  
Serial number: 6363  
Instrument name: Voyager-DE PRO  
Plate type filename: C:\VOYAGER\100 well plate.plt  
Lab name: PE Biosystems

Absolute x-position: 26179.4  
Absolute y-position: 32111.4  
Relative x-position: -808.102  
Relative y-position: 43.8993  
Shots in spectrum: 600  
Source pressure: 3.63e-007  
Mirror pressure: 1.112e-007  
TC2 pressure: 0.001  
TIS gate width: 8  
TIS flight length: 689.45

### Applied Biosystems Voyager System 6363

Voyager Spec #1=>NR(2.00)=>SM19=>NF0.7[BP = 27959.7, 787]

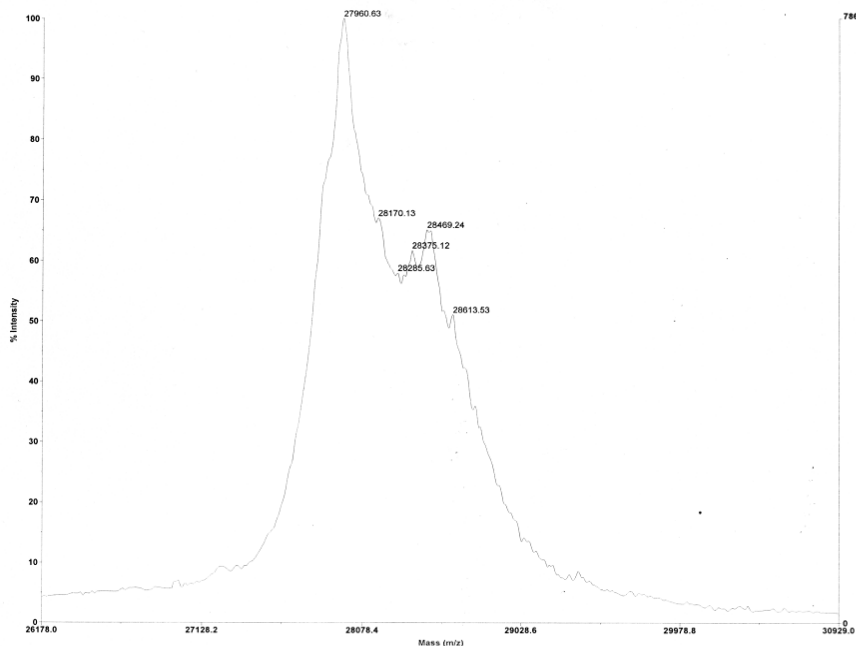

Mode of operation: Linear  
Extraction mode: Delayed  
Polarity: Positive  
Acquisition control: Manual

Accelerating voltage: 25000 V  
Grid voltage: 92.2%  
Guide wire 0: 0.15%  
Extraction delay time: 350 nsec

Acquisition mass range: 10000 – 40000 Da  
Number of laser shots: 100/spectrum  
Laser intensity: 1712  
Laser Rep Rate: 20.0 Hz  
Calibration type: Default  
Calibration matrix: Sinapinic acid  
Low mass gate: 5000 Da

Digitizer start time: 60.832  
Bin size: 2 nsec  
Number of data points: 30291  
Vertical scale: 50 mV  
Vertical offset: 0%  
Input bandwidth: 25 MHz

Sample well: 36  
Plate ID: 1  
Serial number: 6363  
Instrument name: Voyager-DE PRO  
Plate type filename: C:\VOYAGER\100 well plate.plt  
Lab name: PE Biosystems

Absolute x-position: 26179.4  
Absolute y-position: 32111.4  
Relative x-position: -808.102  
Relative y-position: 43.8993  
Shots in spectrum: 600  
Source pressure: 3.63e-007  
Mirror pressure: 1.112e-007  
TC2 pressure: 0.001  
TIS gate width: 8  
TIS flight length: 689.45

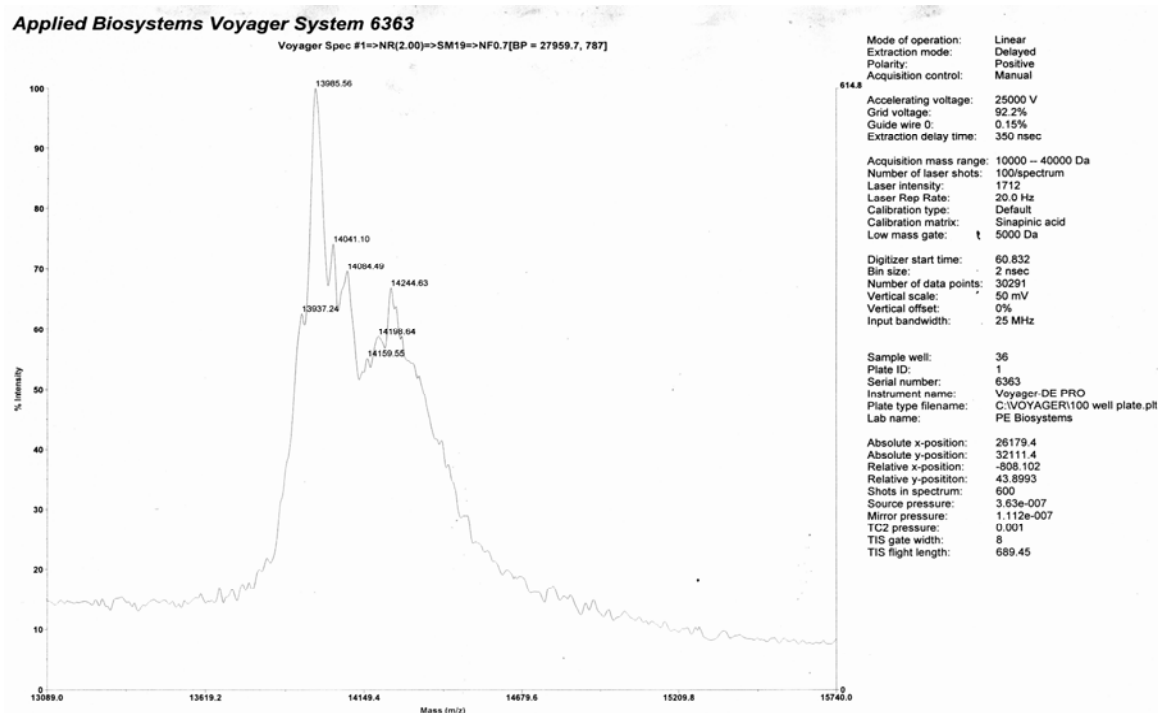

**Figure S9.** MALDI – TOF mass spectrum of Cathepsin B.

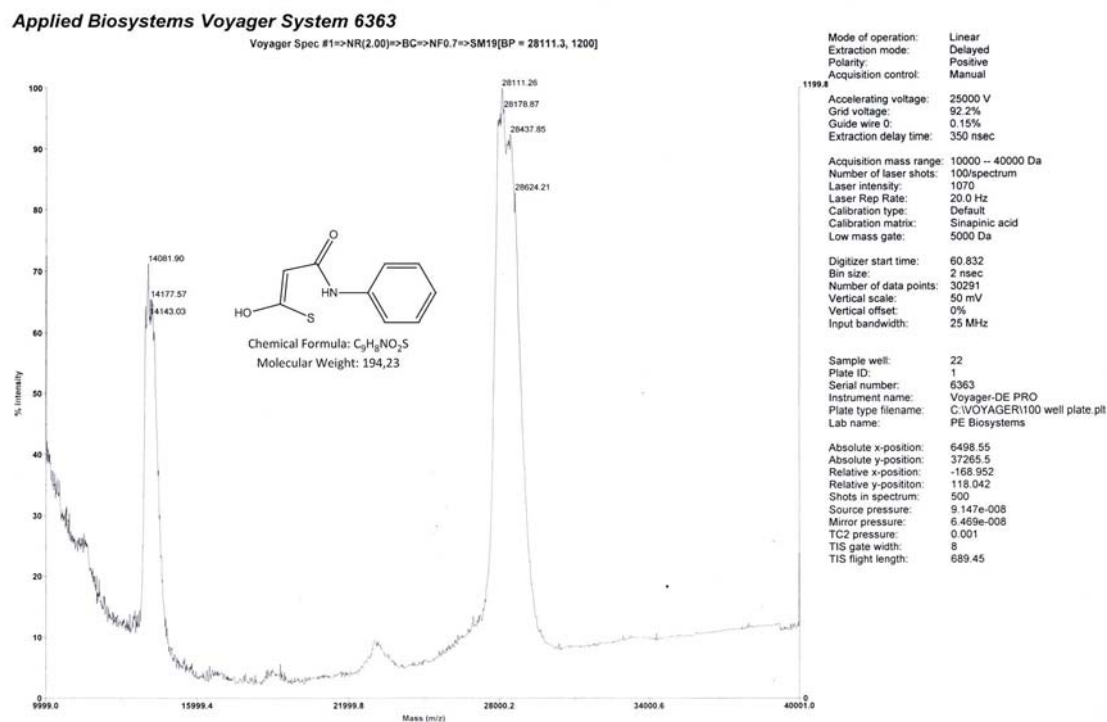

**Applied Biosystems Voyager System 6363**

Voyager Spec #1=>NR(2.00)=>BC=>NF0.7=>SM19[BP = 28111.3, 1200]

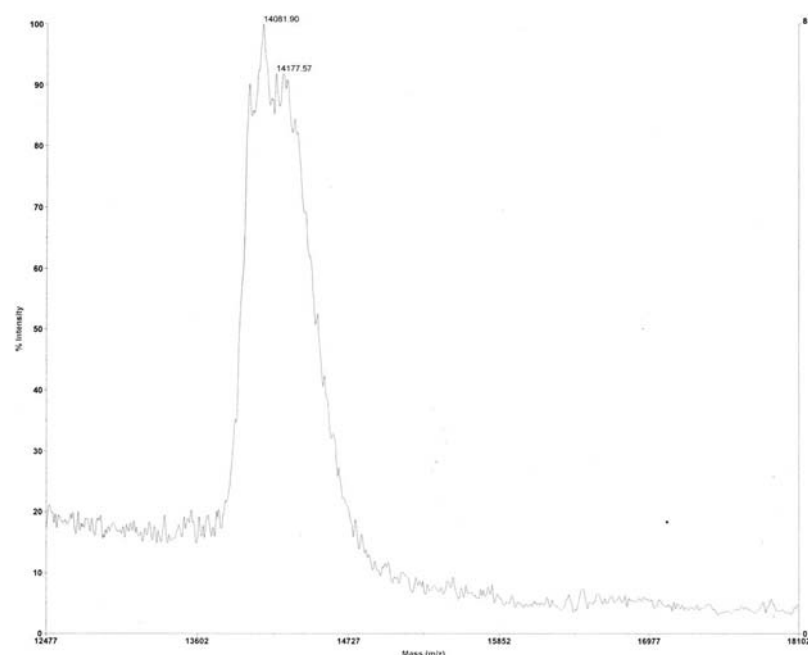

Mode of operation: Linear  
Extraction mode: Delayed  
Polarity: Positive  
Acquisition control: Manual

Accelerating voltage: 25000 V  
Grid voltage: 92.2%  
Guide wire 0: 0.15%  
Extraction delay time: 350 nsec

Acquisition mass range: 10000 – 40000 Da  
Number of laser shots: 100/spectrum  
Laser intensity: 1070  
Laser Rep Rate: 20.0 Hz  
Calibration type: Default  
Calibration matrix: Sinapinic acid  
Low mass gate: 5000 Da

Digitizer start time: 60.832  
Bin size: 2 nsec  
Number of data points: 30291  
Vertical scale: 50 mV  
Vertical offset: 0%  
Input bandwidth: 25 MHz

Sample well: 22  
Plate ID: 1  
Serial number: 6363  
Instrument name: Voyager-DE PRO  
Plate type filename: C:\VOYAGER\100 well plate.plt  
Lab name: PE Biosystems

Absolute x-position: 6498.55  
Absolute y-position: 37265.5  
Relative x-position: -168.952  
Relative y-position: 118.042  
Shots in spectrum: 500  
Source pressure: 9.147e-008  
Mirror pressure: 6.469e-008  
TC2 pressure: 0.001  
TIS gate width: 8  
TIS flight length: 689.45

**Applied Biosystems Voyager System 6363**

<<Cath B +FD531\_0001>> Voyager Spec #1=>NR(2.00)=>BC=>NF0.7=>SM19[BP = 28111.3, 1200]

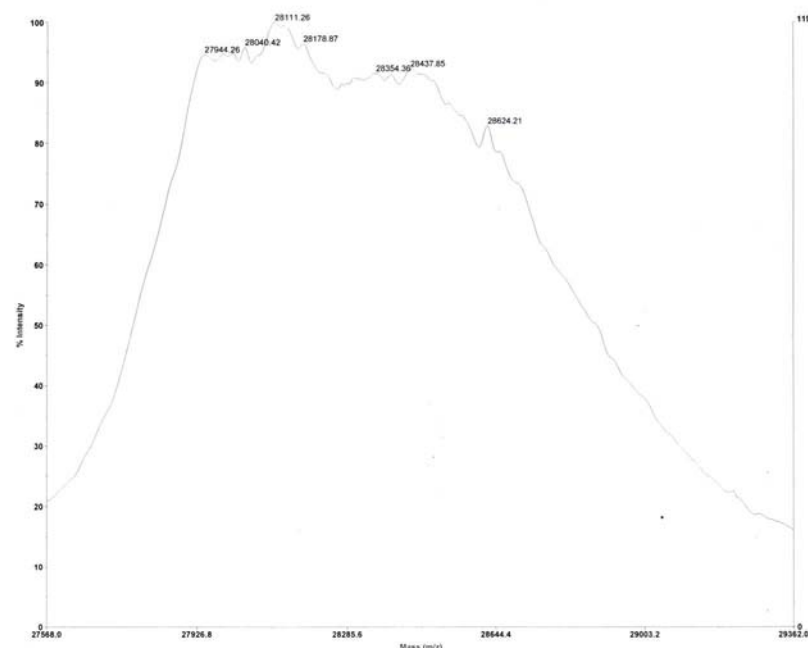

Mode of operation: Linear  
Extraction mode: Delayed  
Polarity: Positive  
Acquisition control: Manual

Accelerating voltage: 25000 V  
Grid voltage: 92.2%  
Guide wire 0: 0.15%  
Extraction delay time: 350 nsec

Acquisition mass range: 10000 – 40000 Da  
Number of laser shots: 100/spectrum  
Laser intensity: 1070  
Laser Rep Rate: 20.0 Hz  
Calibration type: Default  
Calibration matrix: Sinapinic acid  
Low mass gate: 5000 Da

Digitizer start time: 60.832  
Bin size: 2 nsec  
Number of data points: 30291  
Vertical scale: 50 mV  
Vertical offset: 0%  
Input bandwidth: 25 MHz

Sample well: 22  
Plate ID: 1  
Serial number: 6363  
Instrument name: Voyager-DE PRO  
Plate type filename: C:\VOYAGER\100 well plate.plt  
Lab name: PE Biosystems

Absolute x-position: 6498.55  
Absolute y-position: 37265.5  
Relative x-position: -168.952  
Relative y-position: 118.042  
Shots in spectrum: 500  
Source pressure: 9.147e-008  
Mirror pressure: 6.469e-008  
TC2 pressure: 0.001  
TIS gate width: 8  
TIS flight length: 689.45

**Figure S10.** MALDI – TOF mass spectrum of Cathepsin B that was pre-incubated with inhibitor 5.

## References

1. E. V. Anslyn and D. A. Dougherty, *University Science Books*, 2006, 22.
2. F. J. Dekker, M. Ghizzoni, N. Van der Meer, R. Wisastra and H. J. Haisma, *Bioorg. Med. Chem.*, 2009, **17**, 460-466.
3. M. Ghizzoni, H. J. Haisma and F. J. Dekker, *Eur J Med Chem*, 2009, **44**, 4855-4861.
